# Supplementary material
Source: MDPI journal article supplement (https://www.mdpi.com/2313-0105/9/3/158)
Supplement: s1 [file s1]

## Supporting Information

# Zn-Co-Mo-rGO Ultra-Thin Nanosheets Arrays-Based Electrode Materials for Asymmetric Supercapacitor

Shuang Liu <sup>1</sup>, Siwei He <sup>1</sup>, Yanhong Xiang <sup>1</sup>, Xiaochun Peng <sup>2</sup>, Lizhi Xiong <sup>3</sup> and Jianhua Wu <sup>1, \*</sup>

<sup>1</sup> College of Physics and Electromechanical Engineering, Jishou University, Jishou, 416000, China

<sup>2</sup> College of Chemistry and Chemical Engineering, Jishou University, Jishou, 416000, China

<sup>3</sup> College of Pharmacy, Jishou University, Jishou, 416000, China

\* Correspondence: jianhuawu@jsu.edu.cn

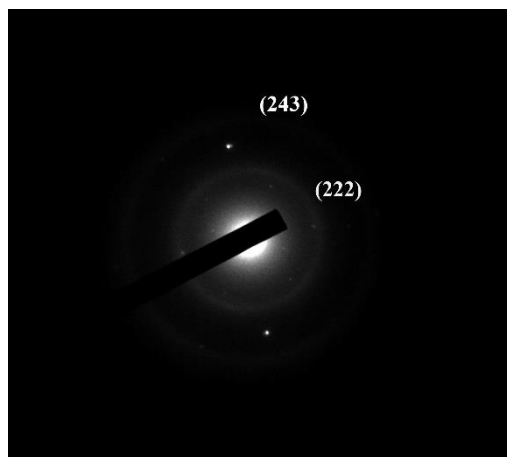

Figure S1. SAED pattern of ZCM.

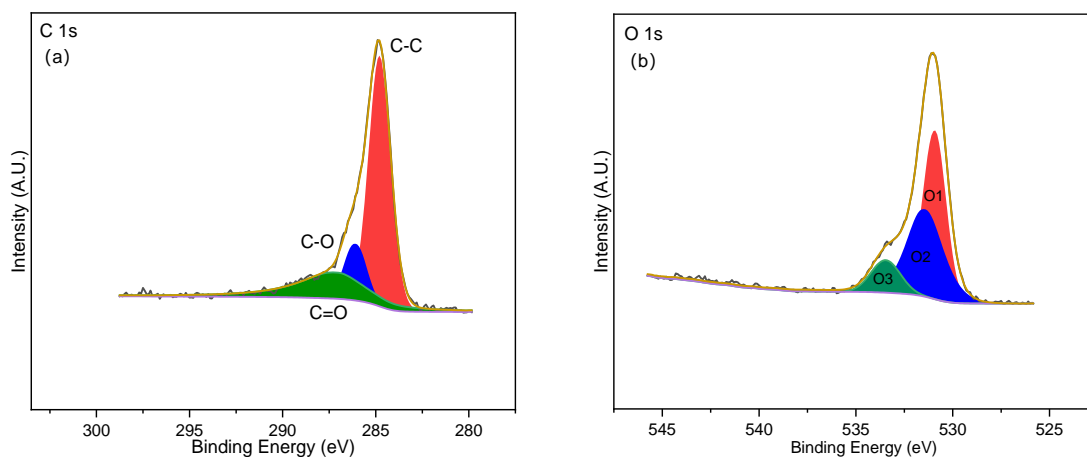

Figure S2. XPS spectra of ZCMG. (a) C 1s and (b) O 1s.

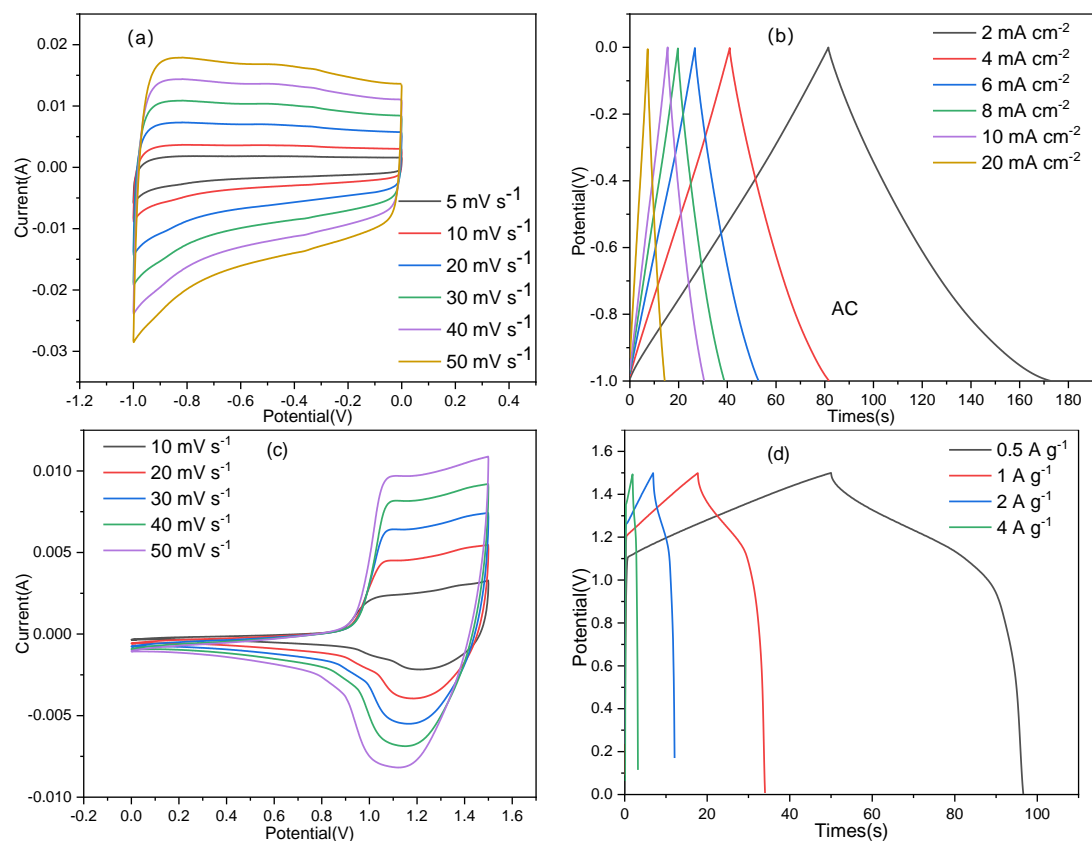

**Figure S3.** (a) CV plots of AC at different scan rates. (b) GCD plots of AC at different current densities. (c) CV plots of ZCM//AC ASC at different scan rates. (d) GCD plots of ZCM//AC ASC at different current densities.
